# Supplementary material
Source: publisher figshare collection journal article supplement (https://acs.figshare.com/ndownloader/files/21893052)
Supplement: Supplementary file 1 [file 21893052]

## **Supporting Information**

### **The Influence of Hydrophobic Chains in Nanocarriers on Antitumor Efficacy of Docetaxel Nanoparticles**

Zhengqi Dong,<sup>a</sup> Yiping Shen,<sup>a,b</sup> Shuang Zhao,<sup>a,b</sup> Xiangtao Wang,<sup>a</sup> Meihua Han,<sup>a</sup> Ning Zhao,<sup>c</sup> Hui Ao,<sup>a</sup> Yifei Guo<sup>a,\*</sup>

<sup>a</sup> Institute of Medicinal Plant Development, Chinese Academy of Medical Sciences & Peking Union Medical College, No. 151, Malianwa North Road, Haidian District, Beijing 100193, China

<sup>b</sup> Research Center on Life Sciences and Environmental Sciences, Harbin University of Commerce, No. 138, Tongda Street, Daoli District, Harbin 150076, China

<sup>c</sup> Department of Pharmacy, Xiyuan Hospital, China Academy of Chinese Medical Sciences, No.1, Xiyuancaochang, Haidian District, Beijing 100091, China

Table S1. Conditions and results for DTX-loaded nanoparticles.

| Nanocarrier                         | DTX:nanocarrier<br>(mg:mg) | Yield<br>(%) | DLC<br>(%) | EE<br>(%) |
|-------------------------------------|----------------------------|--------------|------------|-----------|
| PEG <sub>45</sub> PCL <sub>17</sub> | 4:16                       | 68           | 12.6       | 42.8      |
| PEG <sub>45</sub> PCL <sub>17</sub> | 4:8                        | 69           | 24.1       | 49.8      |
| PEG <sub>45</sub> PCL <sub>17</sub> | 8:4                        | 65           | 49.8       | 48.5      |
| PEG <sub>45</sub> PCL <sub>17</sub> | 16:4                       | 58           | 60.1       | 43.5      |
| PEG <sub>45</sub>                   | 4:16                       | 59           | 13.4       | 39.5      |
| PEG <sub>45</sub>                   | 4:8                        | 61           | 19.9       | 36.4      |
| PEG <sub>45</sub>                   | 8:4                        | 60           | 34.9       | 31.4      |
| PEG <sub>45</sub>                   | 16:4                       | 52           | 58.4       | 37.9      |

Table S2. GPC results for PEG<sub>45</sub>PCL<sub>17</sub> in different solutions with different incubation times

| Time | H <sub>2</sub> O |      | saline |      | Glucose |      | PBS  |      |
|------|------------------|------|--------|------|---------|------|------|------|
| e    | Mn               | PDI  | Mn     | PDI  | Mn      | PDI  | Mn   | PDI  |
| 3 d  | 5398             | 1.17 | 5519   | 1.20 | 5347    | 1.15 | 5255 | 1.16 |
| 7 d  | 5387             | 1.17 | 5291   | 1.18 | 5521    | 1.16 | 5075 | 1.22 |

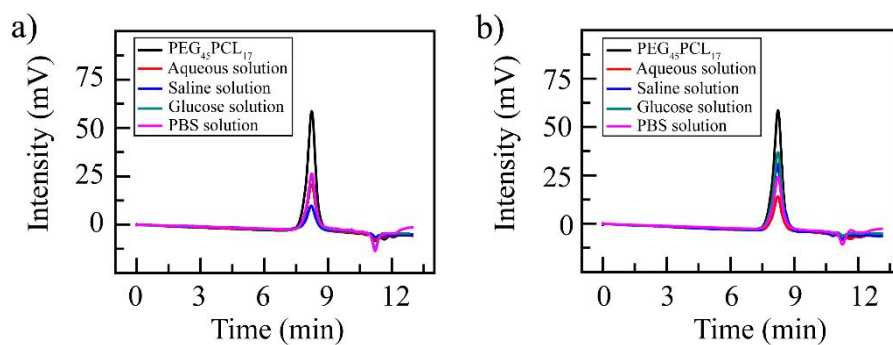Figure S1. Molar mass distribution curves for PEG<sub>45</sub>PCL<sub>17</sub> in different media after incubation for 3 d (a) and 7 d (b) at 37 °C. The black curve represents the original solid PEG<sub>45</sub>PCL<sub>17</sub>.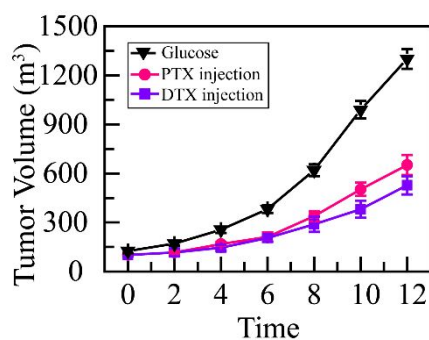Figure S2. Tumor volume change curves for the glucose solution group, PTX injection group, and DTX injection group. (mean  $\pm$  SD, n = 8)
